# Supplementary material
Source: Springer Nature journal article supplement (https://www.springermedizin.de/resource/supplementary/12916_2011_569_MOESM10_ESM.pdf/9598170)

**A**

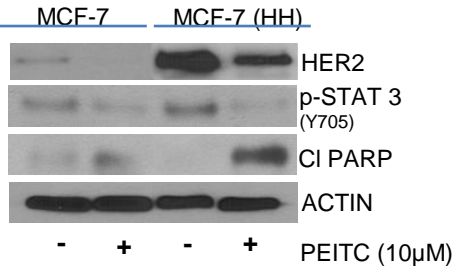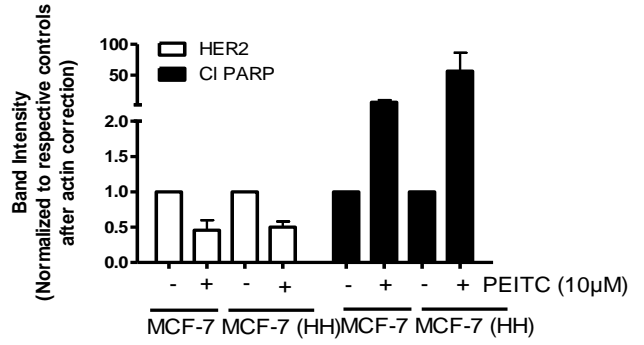

**B**

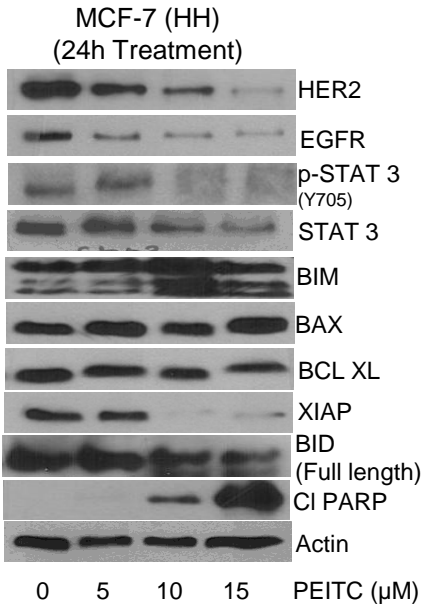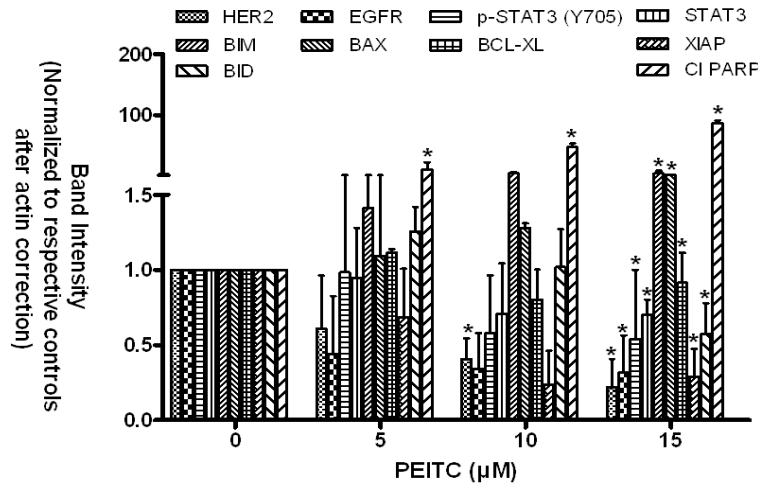

**C**

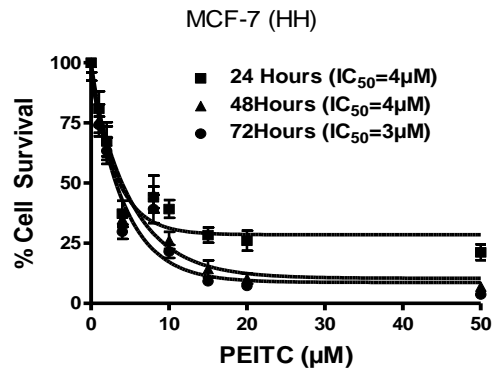

Supplement: MOESM10 [file 9598170]
